# Supplementary material for: Linking biogeochemistry to hydro-geometrical variability in tidal estuaries: a generic modeling approach
Source: Copernicus journal article supplement (doi:10.5194/hess-20-991-2016), 2016-03-07
Supplement: Supplementary file 1 [file hess-20-991-2016-supplement.pdf]

Supplement of Hydrol. Earth Syst. Sci., 20, 991–1030, 2016  
<http://www.hydrol-earth-syst-sci.net/20/991/2016/>  
doi:10.5194/hess-20-991-2016-supplement  
© Author(s) 2016. CC Attribution 3.0 License.

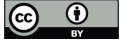

*Supplement of*

## **Linking biogeochemistry to hydro-geometrical variability in tidal estuaries: a generic modeling approach**

**Chiara Volta et al.**

*Correspondence to:* Chiara Volta (cvolta@ulb.ac.be)

The copyright of individual parts of the supplement might differ from the CC-BY 3.0 licence.

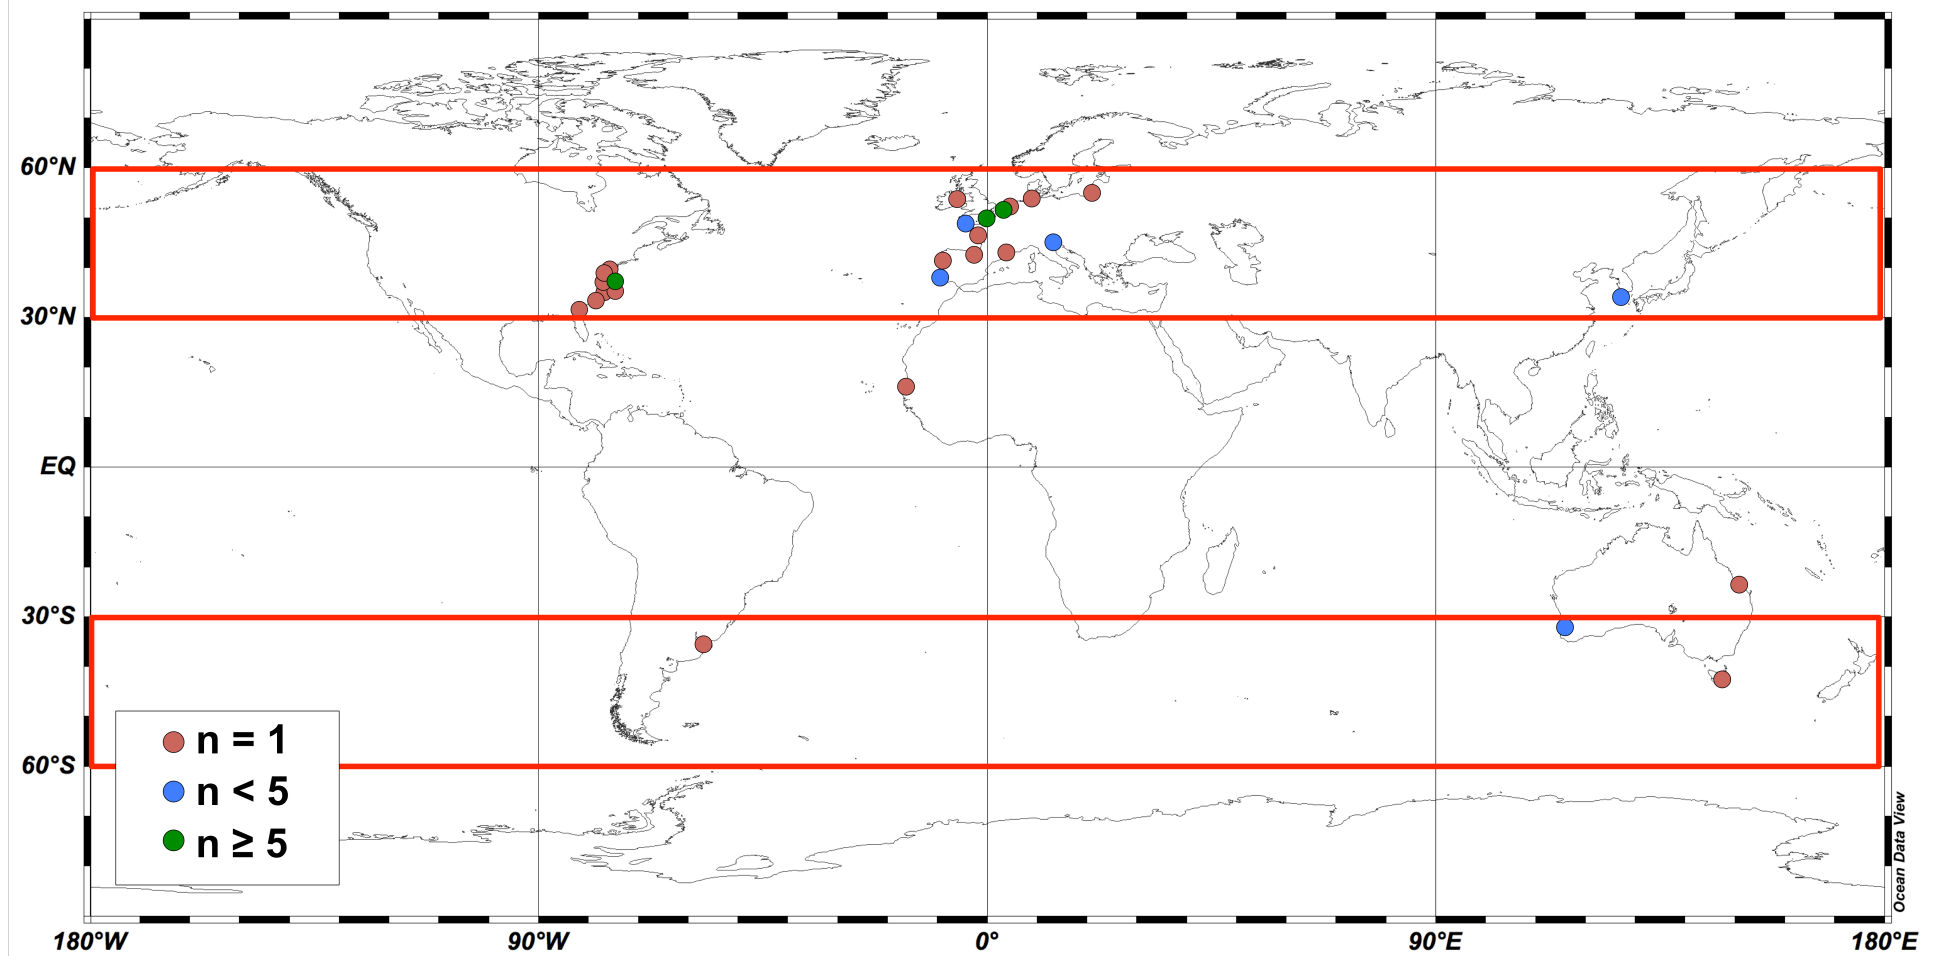

Location of published estuarine biogeochemical model applications ( $n=51$ ) and their distribution amongst different climatic zones. Red, blue and green dots correspond to locations in which 1, and less than 5 or more than 5 model applications have been published, respectively. The limits of the temperate zones ( $30^\circ < \text{lat} < 60^\circ$ ) in either hemisphere are highlighted in red.
